# Supplementary material for: Photodegradation of Brilliant Green Dye by a Zinc bioMOF and Crystallographic Visualization of Resulting CO2
Source: MDPI journal article supplement (doi:10.3390/molecules26134098), 2021-07-05
Supplement: s1 [file s1]

**Electronic Supporting Information (ESI)** for the manuscript:

**Photodegradation of Brilliant Green Dye by a Zinc  
bioMOF and Crystallographic Visualization of  
resulting CO<sub>2</sub>**

Paula Escamilla, Marta Viciano-Chumillas, Rosaria Bruno, Donatella Armentano  
Emilio Pardo and Jesús Ferrando-Soria

## Experimental Section

**Materials.** All chemicals were of reagent grade quality. They were purchased from commercial sources and used as received. The proligand  $\text{H}_2\text{Me}_2\text{-(}S,S\text{)-serimox}$  was prepared as previously reported.<sup>1</sup>

**$(\text{Me}_4\text{N})_2\{\text{Ni}_2[(S,S)\text{-serimox}](\text{OH})_2\} \cdot 5\text{H}_2\text{O}$ .** An aqueous solution (100 mL) of  $\text{H}_2\text{Me}_2\text{-(}S,S\text{)-serimox}$  (5.00 g, 17 mmol) was treated with a 25% methanolic solution of  $\text{Me}_4\text{NOH}$  (28 mL, 68 mmol). Then, to the resulting solution,  $\text{NiCl}_2 \cdot 6\text{H}_2\text{O}$  (4.43 g, 34 mmol) in 30 mL of water was added dropwise under magnetic stirring. The green solution was filtered to remove the solid precipitate and concentrated in a rotatory evaporator to afford a green solid that was gently washed with acetone filtered off and dried under vacuum. Yield: 7.97 g, 83%. IR (KBr):  $\nu = 3389\text{ cm}^{-1}$  (O–H), 3019 and 2961  $\text{cm}^{-1}$  (C–H), 1604  $\text{cm}^{-1}$  (C=O).

**$\{\text{Zn}^{\text{II}}_2[(S,S)\text{-serimox}](\text{H}_2\text{O})_2\} \cdot \text{H}_2\text{O}$  (1).** Two synthetic procedures can be followed to obtain **1**. In a direct one, an aqueous solution (30 mL) of  $\text{H}_2\text{Me}_2\text{-(}S,S\text{)-serimox}$  (3.6 g, 12 mmol) and a 25% methanolic solution of  $\text{Me}_4\text{NOH}$  (19.8 mL, 48 mmol) was added dropwise to an aqueous solution  $\text{Zn}(\text{NO}_3)_2 \cdot 6\text{H}_2\text{O}$  (7.15 g, 26 mmol) in 5 mL. The solution mixture was stirred overnight and a white powder was obtained and collected by filtration, washed with water and methanol. Yield: 4.7 g, 88%. Anal.: calcd for  $\text{C}_8\text{H}_{14}\text{N}_2\text{O}_{11}\text{Zn}_2$  (444.96): C, 21.59; H, 3.17; N, 6.30%. Found: C, 21.83; H, 3.23; N, 6.42%. IR (KBr):  $\nu = 1604\text{ cm}^{-1}$  (C=O).

Alternatively, it could be followed an indirect pathway. For that,  $(\text{Me}_4\text{N})_2\{\text{Ni}_2[(S,S)\text{-serimox}](\text{OH})_2\} \cdot 5\text{H}_2\text{O}$  (1.37 g, 2.44 mmol) was dissolved in 10 mL mixture water/methanol (1:1) and then,  $\text{Zn}(\text{NO}_3)_2 \cdot 6\text{H}_2\text{O}$  (1.45 g, 4.88 mmol) was added under stirring. After further stirring for 10 h, at room temperature, a white powder was obtained and collected by filtration, washed with water and methanol. Yield: 0.91 g, 83%;

Anal.: calcd for  $C_8H_{14}N_2O_{11}Zn_2$  (444.96): C, 21.59; H, 3.17; N, 6.30%. Found: C, 20.99; H, 3.14; N, 6.09%. IR (KBr):  $\nu = 1604\text{ cm}^{-1}$  (C=O).

Suitable single crystals of **1** for X-ray structural analysis were obtained by slow diffusion, in an H-shaped tube, of  $H_2O/MeOH$  (1:1) solutions containing stoichiometric amounts of  $(Me_4N)_2\{Ni_2[(S,S)\text{-serimox}](OH)_2\} \cdot 5H_2O$  (0.13 g, 0.18 mmol) in one arm and  $Zn(NO_3)_2 \cdot 6H_2O$  (0.072 g, 0.36 mmol) in the other. They were isolated by filtration on paper and air-dried.

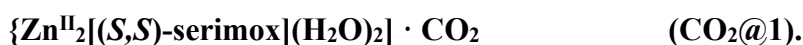

Suitable single crystals of **CO<sub>2</sub>@1** for X-ray structural analysis were obtained by irradiating crystals of **1** with an UV lamp in the range of  $\lambda = 250\text{-}350\text{ nm}$ , for 60 min and then left crystals in a sealed glass tube containing aqueous solution of BG dye for one week.

**Physical Techniques.** Elemental (C, H, S, N) analyses were performed at the Microanalytical Service of the Universitat de València. FT-IR spectra were recorded on a Perkin-Elmer 882 spectrophotometer as KBr pellets. The thermogravimetric analyses were performed on crystalline samples under a dry  $N_2$  atmosphere with a Mettler Toledo TGA/STDA 851° thermobalance operating at a heating rate of  $10\text{ }^\circ\text{C min}^{-1}$ . Thermogravimetric analysis coupled with mass spectrometry was performed at the Servicios Técnicos de Investigación of the Universidad de Alicante.

**X-ray Powder Diffraction Measurements.** Polycrystalline samples of **1** –before and after photocatalytic experiments– were introduced into 0.5 mm borosilicate capillaries prior to being mounted and aligned on an Empyrean PANalytical powder diffractometer, using  $Cu\text{ K}\alpha$  radiation ( $\lambda = 1.54056\text{ \AA}$ ). For each sample, five repeated

measurements were collected at room temperature ( $2\theta = 2\text{--}60^\circ$ ) and merged in a single diffractogram.

**X-ray crystallographic data collection and structure refinement.** Crystals of **1**, and **CO<sub>2</sub>@1** (crystals of **1** left in a sealed glass tube containing aqueous solution of BG dye for one week, after irradiation in the range 250-350 nm for 60 min) were selected and mounted on a MiTeGen MicroMount in Paratone oil and very quickly placed on a liquid nitrogen stream cooled at 100 K, to avoid the possible degradation upon exposure to air. Diffraction data were collected on a Bruker-Nonius X8APEXII CCD area detector diffractometer using graphite-monochromated Mo-K $\alpha$  radiation ( $\lambda = 0.71073 \text{ \AA}$ ). The data were processed through SAINT<sup>1</sup> reduction and SADABS<sup>2</sup> multi-scan absorption software. The structures were solved with the SHELXS structure solution program, using the Patterson method. The model was refined with version 2018/3 of SHELXL against  $F^2$  on all data by full-matrix least squares.<sup>3</sup>

In the refinement of crystal structures all non-hydrogen atoms of the network were refined anisotropically. In **CO<sub>2</sub>@1**, the C-C and C-O bond lengths of serine moieties have been restrained. It is reasonable and related to flexibility of aminoacid chains confined within pores, which are dynamic components of the frameworks. Restrains on bond lengths and angles of CO<sub>2</sub> molecules, to make the refinement more efficient, have been also applied.

All the hydrogen atoms of the network were set in calculated position and refined isotropically using the riding model. Hydrogen atoms on water molecules were found from  $\Delta F$  map and refined with restrains on O-H length and H-O-H angle. In crystal structure of **1**, lattice water molecules, detected by TGA analysis, were not found by density map. It is likely due to dynamic disorder, as suggested by light residual diffuse densities. CO<sub>2</sub> molecules reside on special positions. They exhibit large thermal disorder

as expected and have been refined considering a population of 50% of the cells (0.5 as occupancy factor). Furthermore, atomic displacement parameters in carbon and oxygen atoms of CO<sub>2</sub> molecules expected to have essentially similar ADPs, have been restrained using EADP instruction.

A summary of the crystallographic data and structure refinement for the two compounds is given in Table S1. The comments for the alerts of level A and B (in **CO<sub>2</sub>@1**, related to thermal and statistic disorder of CO<sub>2</sub> molecules) are described in the CIFs using the validation reply form (vrf). CCDC reference numbers are 2062289-2062290 for **1** and **CO<sub>2</sub>@1**, respectively.

The final geometrical calculations and the graphical manipulations were carried out with PLATON<sup>4</sup> implemented in WinGX,<sup>5</sup> and CRYSTAL MAKER<sup>6</sup> programs, respectively.

### **Photocatalytic experiments**

Photoirradiation experiments were performed inside a commercial photoreactor (LuzChem LZC-4V) with 14 UVC (250 nm) lamps. Absorption spectra were recorded on a Jasco V-670.

**Table S1. Summary of Crystallographic Data for  $\{\text{Zn}^{\text{II}}_2[(S,S)\text{-serimox}](\text{H}_2\text{O})_2\} \cdot \text{H}_2\text{O}$  (1) and  $\{\text{Zn}^{\text{II}}_2[(S,S)\text{-serimox}](\text{H}_2\text{O})_2\} \cdot \text{CO}_2$  ( $\text{CO}_2@1$ ).**

| Compound                                   | 1                                                           | $\text{CO}_2@1$                                                 |
|--------------------------------------------|-------------------------------------------------------------|-----------------------------------------------------------------|
| Formula                                    | $\text{C}_8\text{Zn}_2\text{H}_{12}\text{N}_2\text{O}_{10}$ | $\text{C}_{8.5}\text{Zn}_2\text{H}_{12}\text{N}_2\text{O}_{11}$ |
| $M$ (g mol <sup>-1</sup> )                 | 426.94                                                      | 448.94                                                          |
| $\lambda$ (Å)                              | 0.71073                                                     | 0.71073                                                         |
| Crystal system                             | Tetragonal                                                  | Tetragonal                                                      |
| Space group                                | $P4_12_12$                                                  | $P4_12_12$                                                      |
| $a$ (Å)                                    | 7.6380(10)                                                  | 7.5543(3)                                                       |
| $c$ (Å)                                    | 24.390(4)                                                   | 24.0962(12)                                                     |
| $V$ (Å <sup>3</sup> )                      | 1422.9(4)                                                   | 1375.11(12)                                                     |
| $Z$                                        | 4                                                           | 4                                                               |
| $\rho_{\text{calc}}$ (g cm <sup>-3</sup> ) | 1.993                                                       | 2.169                                                           |
| $\mu$ (mm <sup>-1</sup> )                  | 3.425                                                       | 3.555                                                           |
| $T$ (K)                                    | 100                                                         | 100                                                             |
| $\theta$ range for data collection (°)     | 3.147 to 26.675                                             | 2.826 to 26.987                                                 |
| Completeness to $\theta = 25.0$            | 100%                                                        | 100%                                                            |
| Measured reflections                       | 20277                                                       | 4650                                                            |
| Unique reflections ( $R_{\text{int}}$ )    | 1507 (0.0672)                                               | 1449 (0.0301)                                                   |
| Observed reflections [ $I > 2\sigma(I)$ ]  | 1319                                                        | 1360                                                            |
| Goof                                       | 1.003                                                       | 1.107                                                           |
| $R^a$ [ $I > 2\sigma(I)$ ] (all data)      | 0.0311 (0.0401)                                             | 0.0293 (0.0315)                                                 |
| $wR^b$ [ $I > 2\sigma(I)$ ] (all data)     | 0.0808 (0.0855)                                             | 0.0845 (0.0837)                                                 |
| Flack parameter                            | 0.00(1)                                                     | 0.00(1)                                                         |
| CCDC                                       | 2062289                                                     | 2062290                                                         |

<sup>a</sup>  $R = \sum(|F_o| - |F_c|) / \sum |F_o|$ . <sup>b</sup>  $wR = [\sum w(|F_o| - |F_c|)^2 / \sum w|F_o|^2]^{1/2}$ .

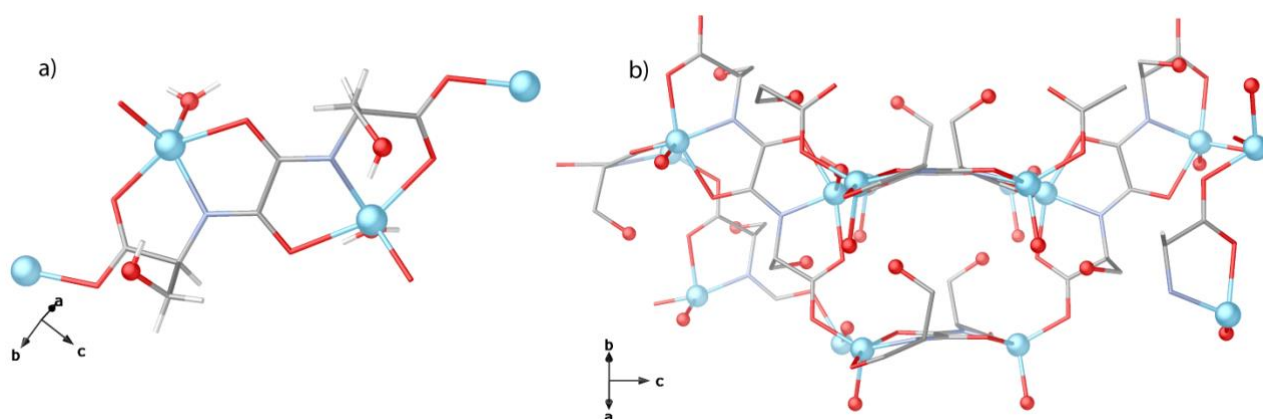

**Fig. S1.** Perspective views of SBUs a) and their assembly by means the carboxylate groups b) in **1**. Colour code: Zn atoms are represented as cyan spheres, C, N, H and O atoms from serimox ligands –with the exception of OH of serine residues– are represented as grey, cyan, white and red sticks. Oxygen atoms from -OH groups are represented as red spheres.

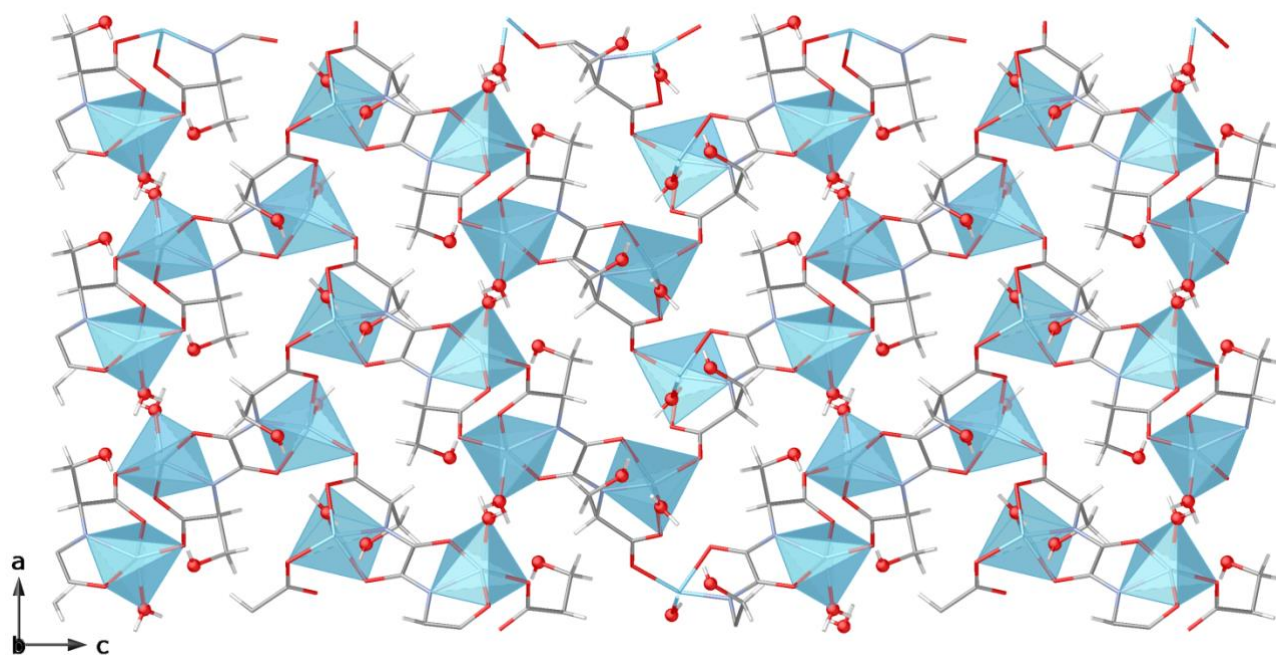

**Fig. S2.** View of the network of **1** along the *b* axes. Colour code: Zn atoms are represented as cyan polyhedra, C, N, H and O atoms from serimox ligands –with the exception of OH of serine residues– are represented as grey, cyan, white and red sticks. Oxygen atoms from -OH groups are represented as red spheres.



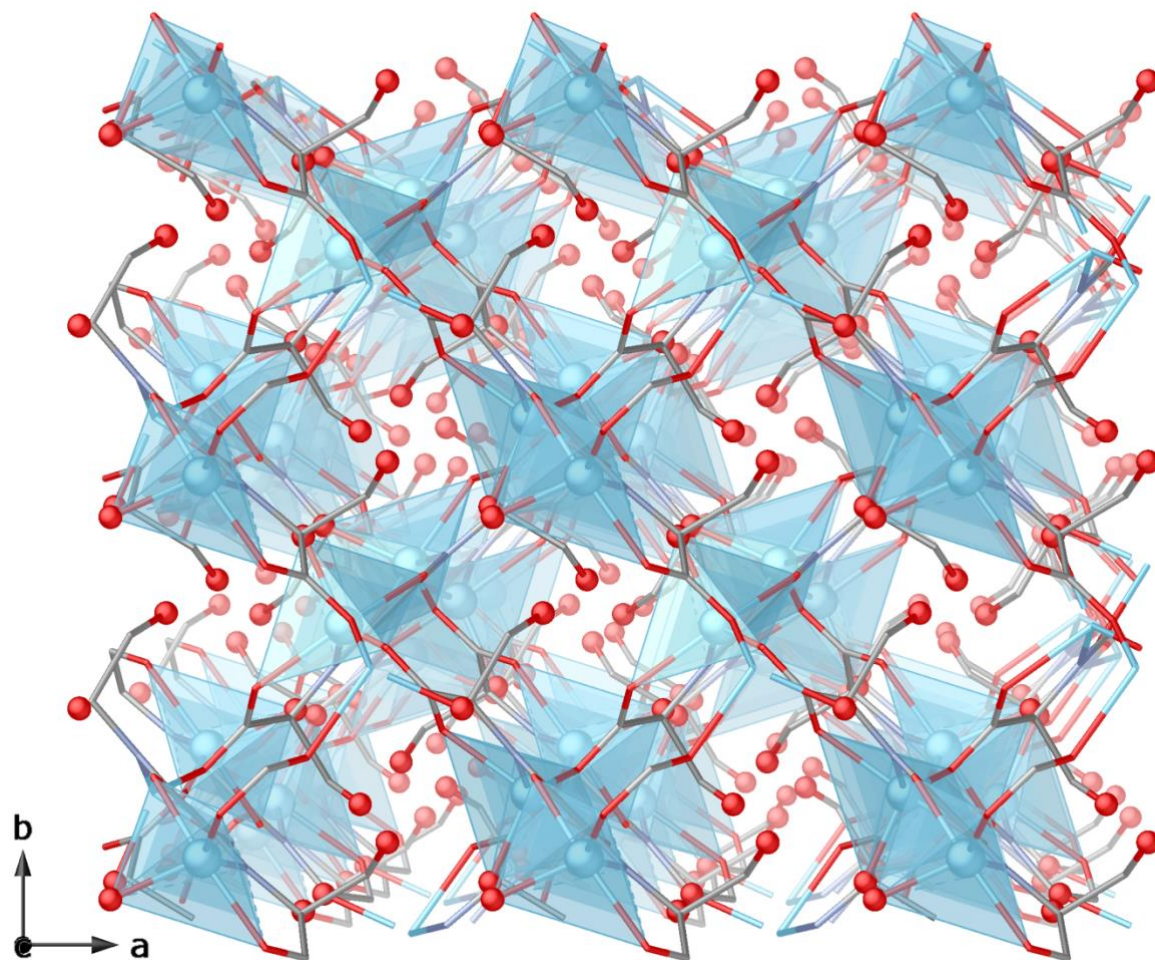

**Fig. S3.** Perspective view of the network of **1** along the *c* axes. Colour code: Zn atoms are represented as cyan polyhedra, C, N, H and O atoms from serimox ligands –with the exception of OH of serine residues– are represented as grey, cyan, white and red sticks. Oxygen atoms from -OH groups are represented as red spheres.

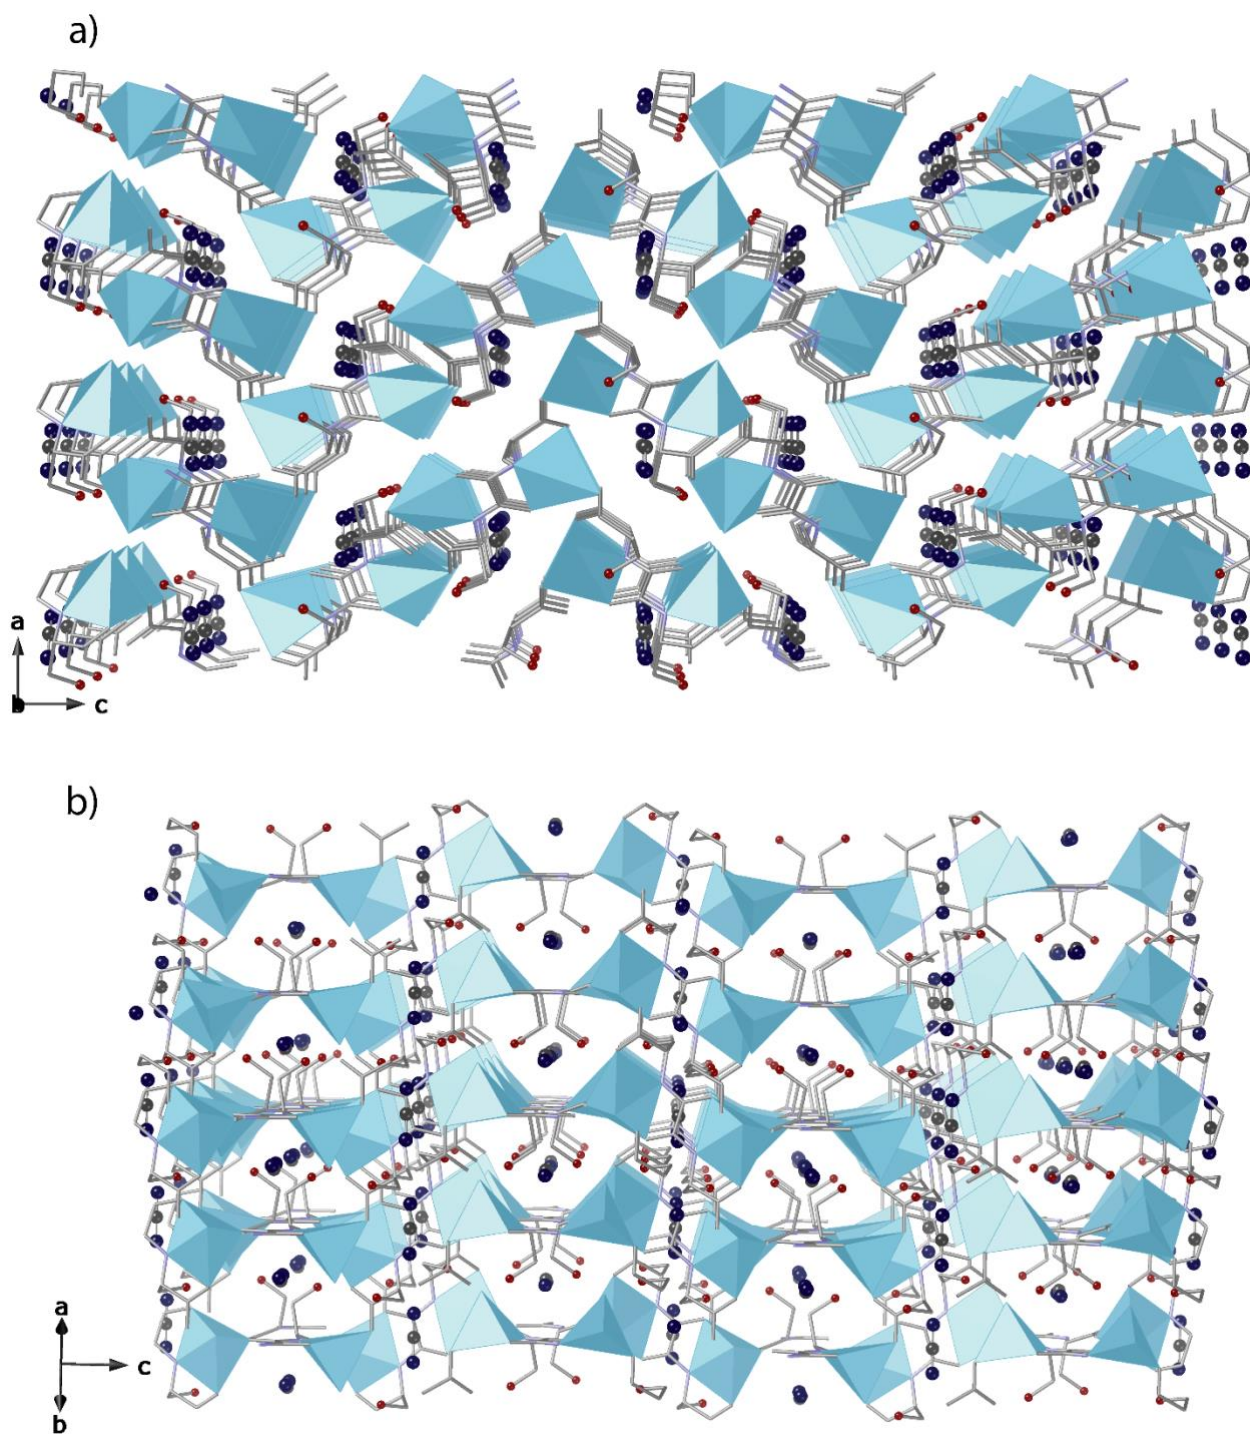

**Fig. S4.** Perspective views of the network of  $\text{CO}_2@1$  along the  $b$  and  $[1\ 1\ 0]$  directions (a and b, respectively) unveiling  $\text{CO}_2$  molecules retained within voids. Colour code: Zn atoms are represented as cyan polyhedra, C, N, and O atoms from serimox ligands –with the exception of OH of serine residues– are represented as grey sticks. Oxygen atoms from -OH groups are represented as red spheres whereas oxygen atoms from guest molecules are represented as deep blue spheres. Hydrogen atoms have been omitted for the sake of clarity.



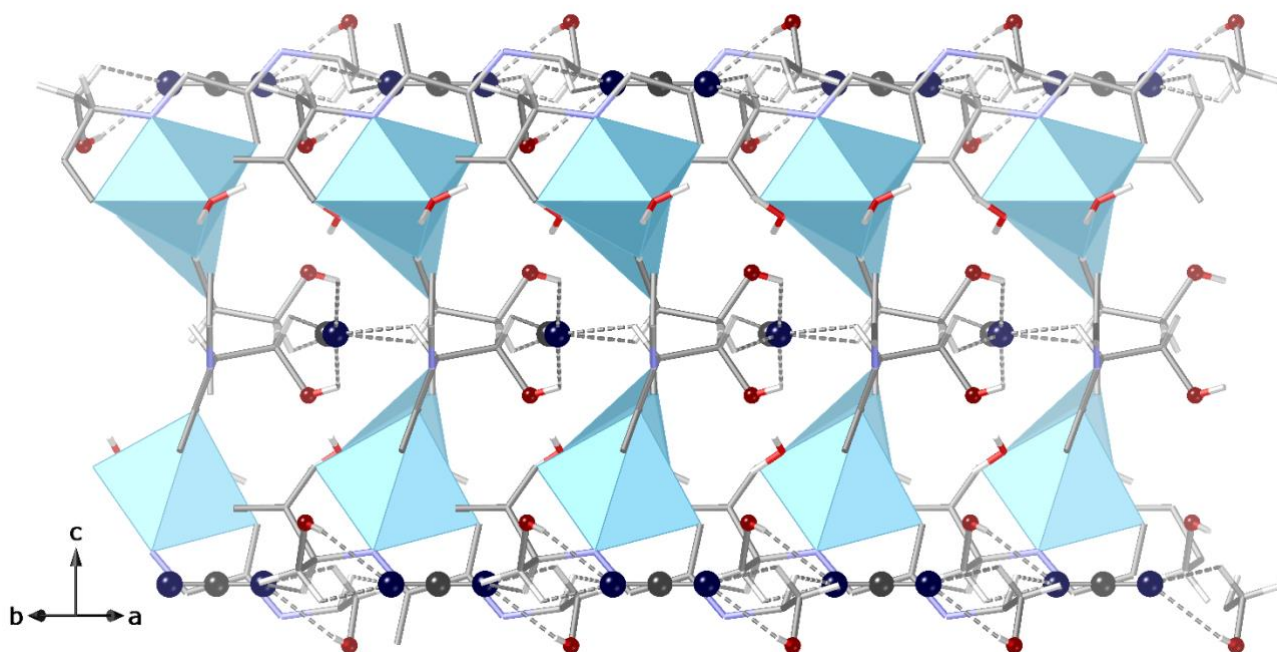

**Fig. S5.** Details of host-guest interactions in  $\text{CO}_2@1$  along the  $c$  [1 1 0] direction. Zn atoms are represented as cyan polyhedra, C, N, and O atoms from serimox ligands –with the exception of OH of serine residues– are represented as grey sticks. Oxygen atoms from -OH groups are represented as red spheres whereas oxygen atoms from guest molecules are represented as deep blue spheres.

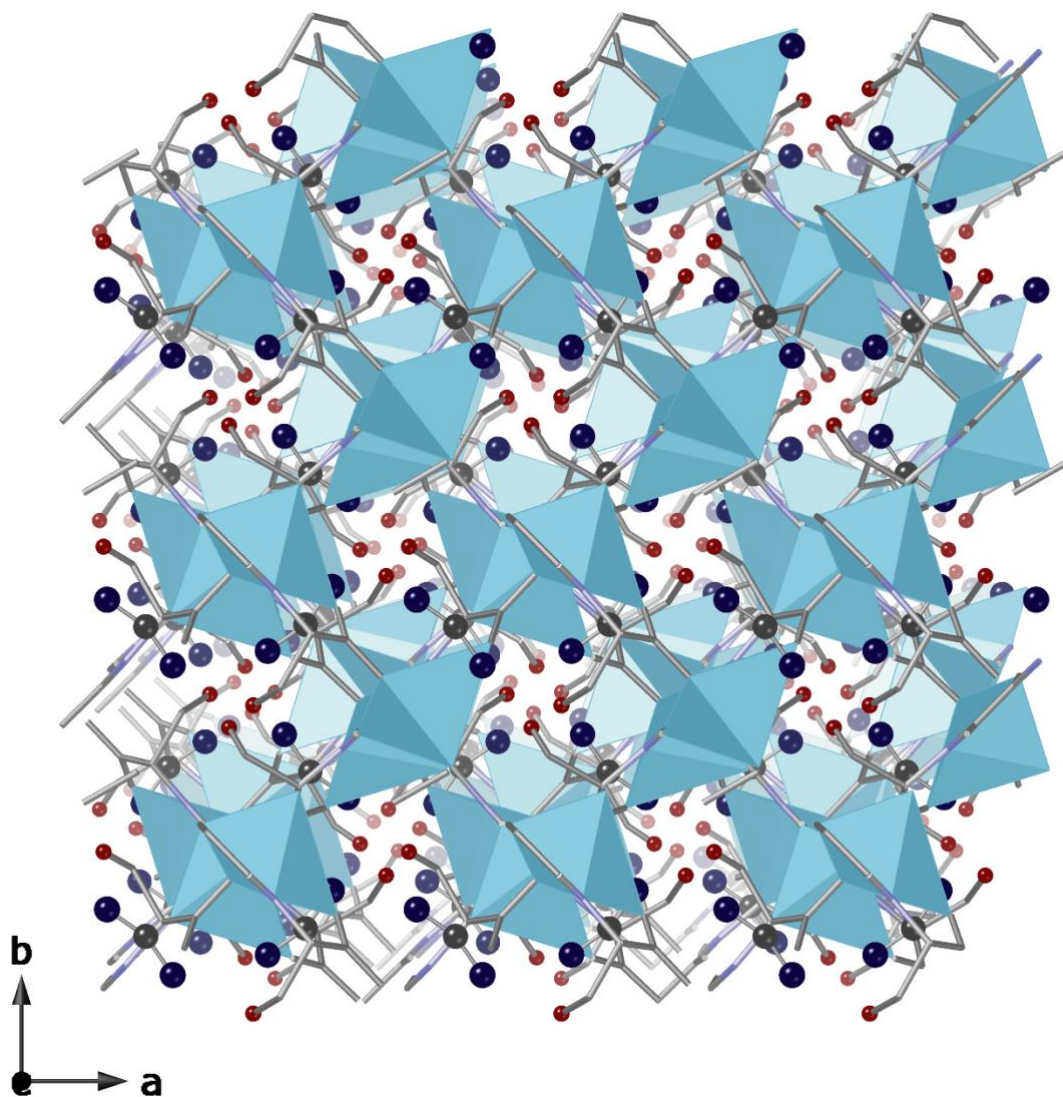

**Fig. S6.** Perspective view of the network of CO<sub>2</sub>@1 along the *c* direction unveiling CO<sub>2</sub> molecules retained within voids. Colour code: Zn atoms are represented as cyan polyhedra, C, N, and O atoms from serimox ligands –with the exception of OH of serine residues– are represented as grey sticks. Oxygen atoms from -OH groups are represented as red spheres whereas oxygen atoms from guest molecules are represented as deep blue spheres. Hydrogen atoms have been omitted for the sake clarity.

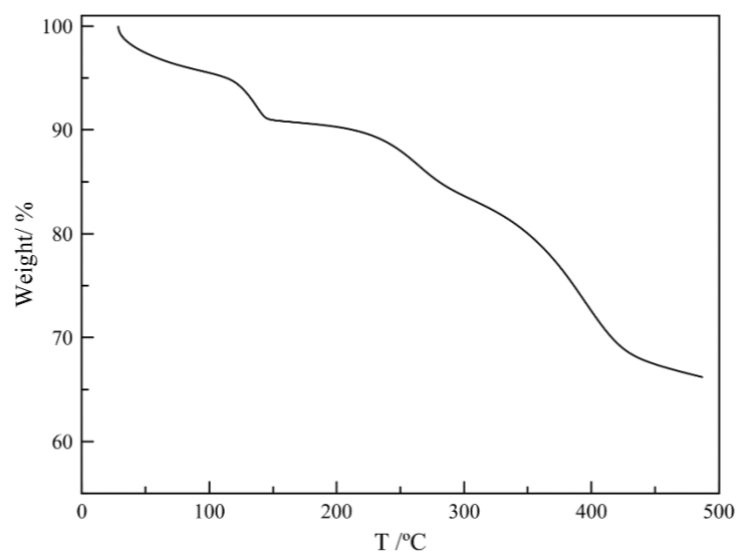

**Fig. S7.** Thermo-Gravimetric Analysis (TGA) of **1** under dry N<sub>2</sub> atmosphere.

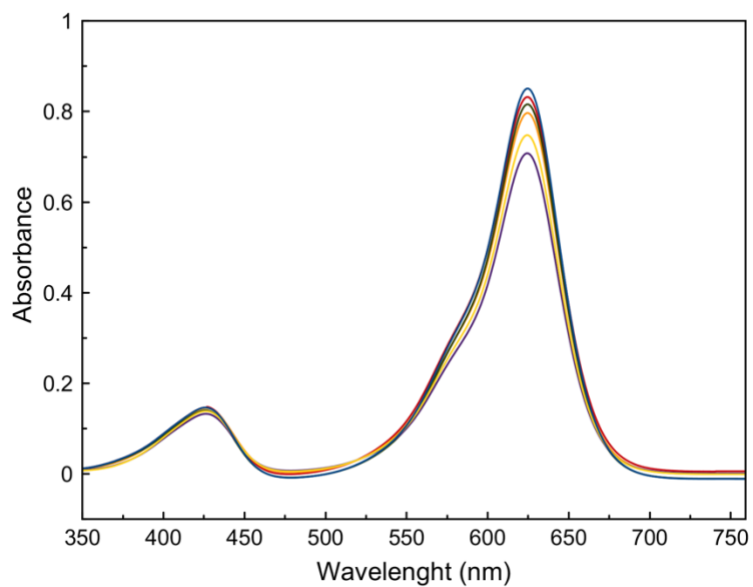

**Fig. S8.** Evolution with time of the UV-Vis absorption spectra of 10 ppm solutions of Brilliant green in water under irradiation at 250 nm. Blue:  $t = 0$ ; Red:  $t = 5$  min.; Green:  $t = 15$  min.; Orange = 30 min.; Yellow:  $t = 60$  min.; Purple:  $t = 120$  min.

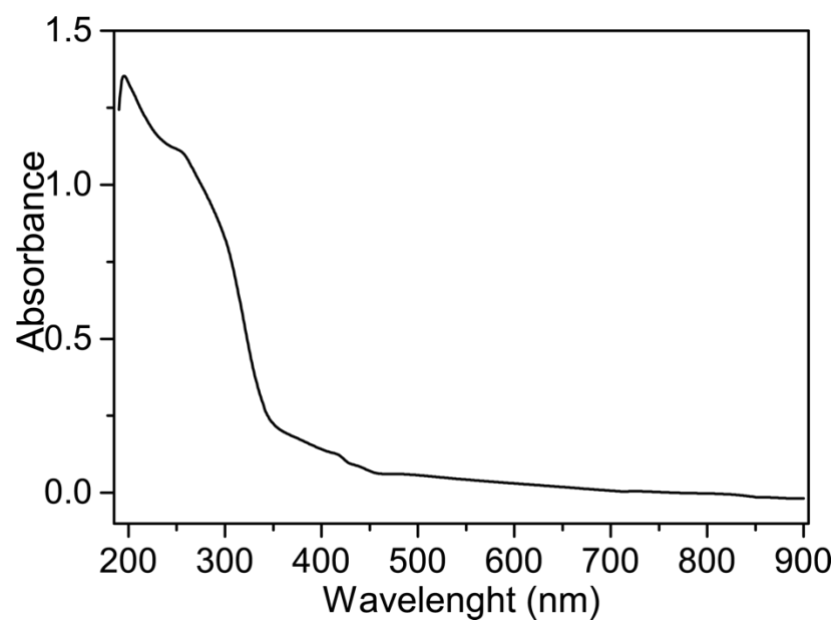

**Fig. S9.** UV-Vis spectrum of a polycrystalline sample of **1**.

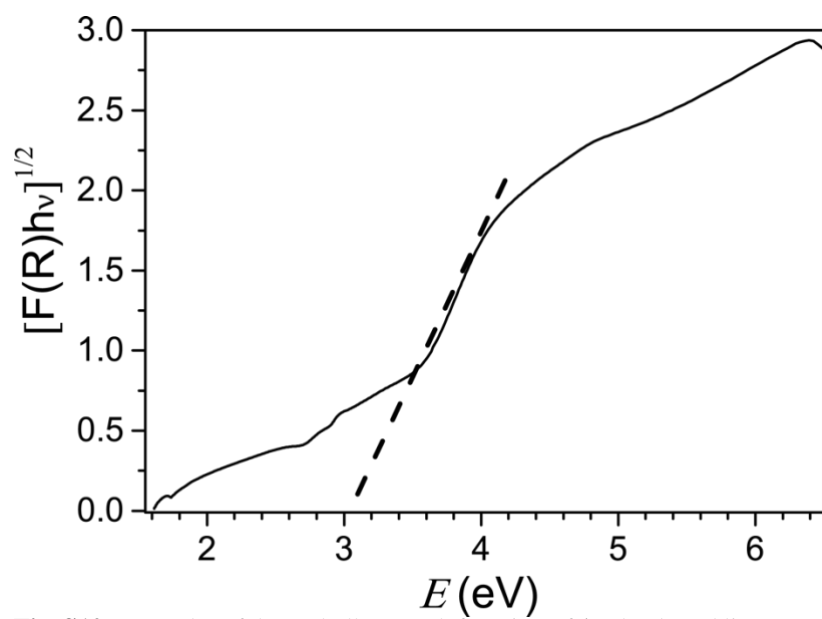

**Fig. S10.** Tauc plot of the Kubelka-Munk function of **1**. The dotted line corresponds to the regression fitting of the linear part of the plot. The optical band-gap of **1** was 3.03 eV.



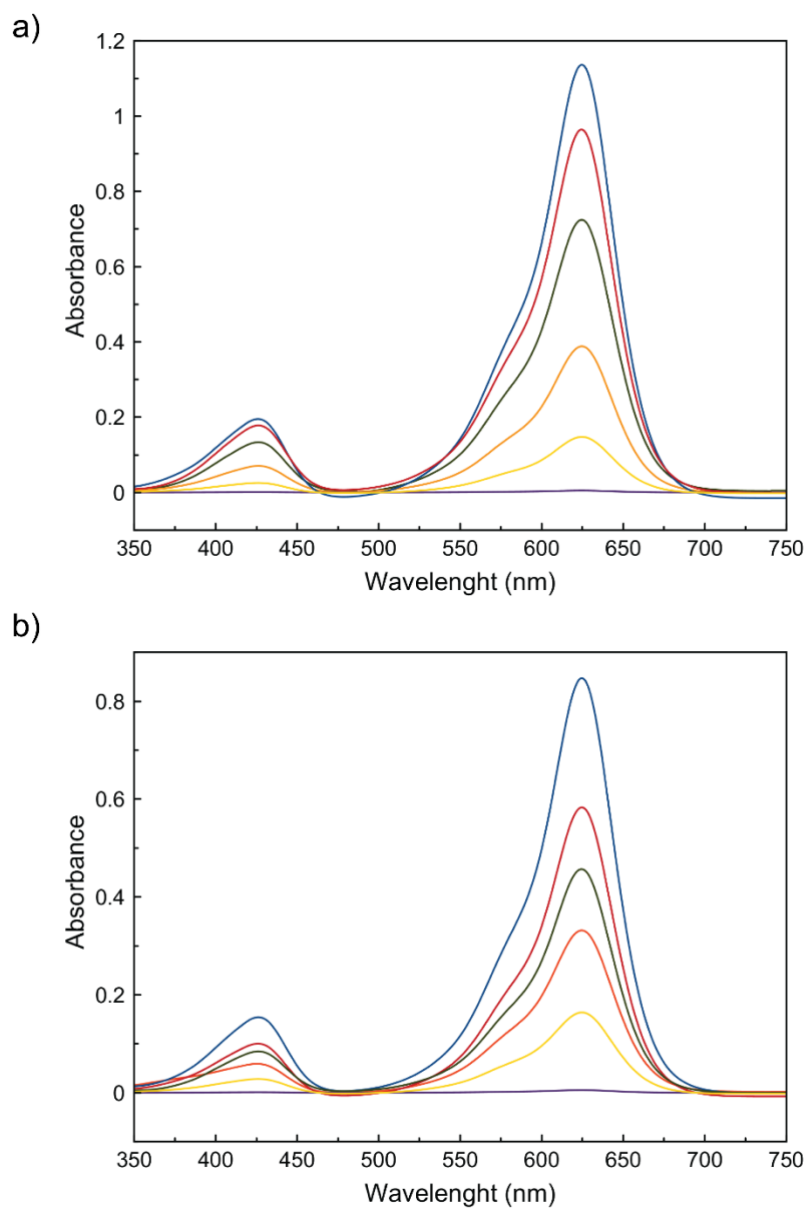

**Fig. S11.** Second (a) and third (b) cycle of the evolution with time of the UV-Vis absorption spectra of 10 ppm solutions of Brilliant green in water in the presence of 25 mg of a polycrystalline sample of **1**. Blue:  $t = 0$ ; Red:  $t = 5$  min.; Green:  $t = 15$  min.; Orange:  $t = 30$  min.; Yellow:  $t = 60$  min.; Purple:  $t = 120$  min.

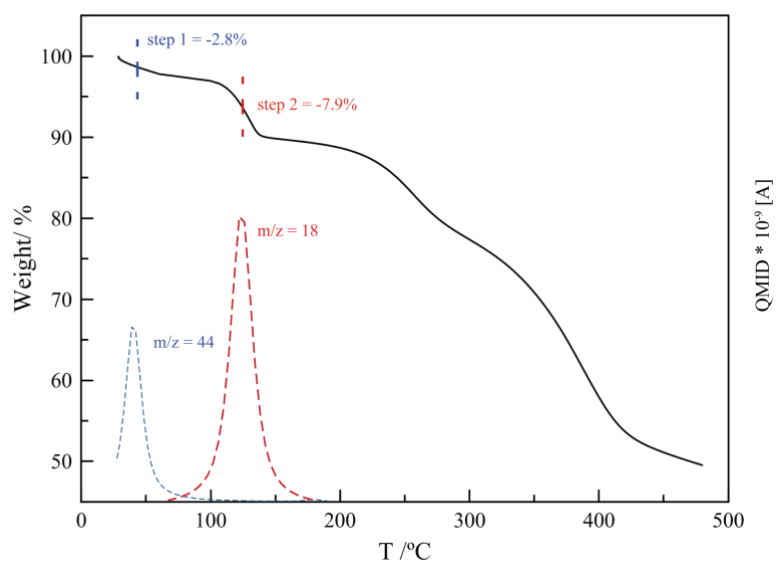

**Fig. S12.** Thermo-Gravimetric coupled with Mass Spectrometry (TG-MS) of **CO@1**. The emission of CO<sub>2</sub> ( $m/z = 44$ ) and water ( $m/z = 18$ ) was monitored with mass spectrometry.

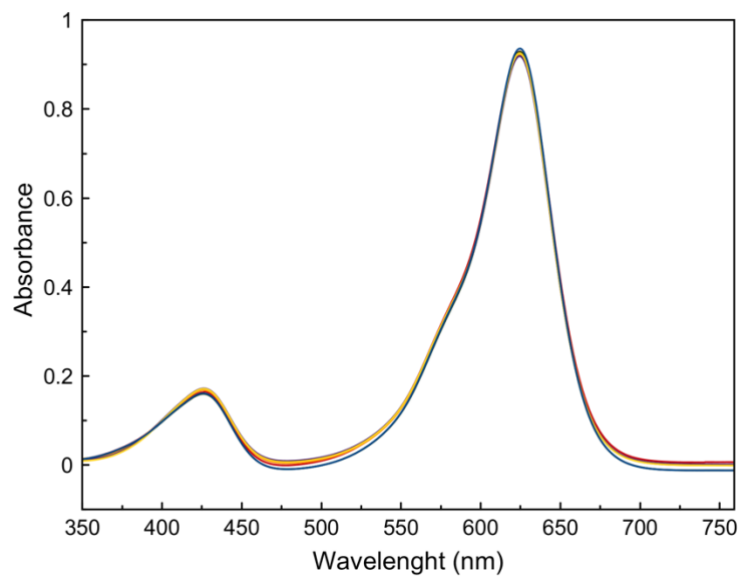

**Fig. S13.** Evolution with time of the UV-Vis absorption spectra of 10 ppm solutions of Brilliant green in water in the dark. Blue:  $t = 0$ ; Red:  $t = 5$  min.; Green:  $t = 10$  min.; Orange = 20 min.; Yellow:  $t = 25$  min.; Purple:  $t = 30$  min..

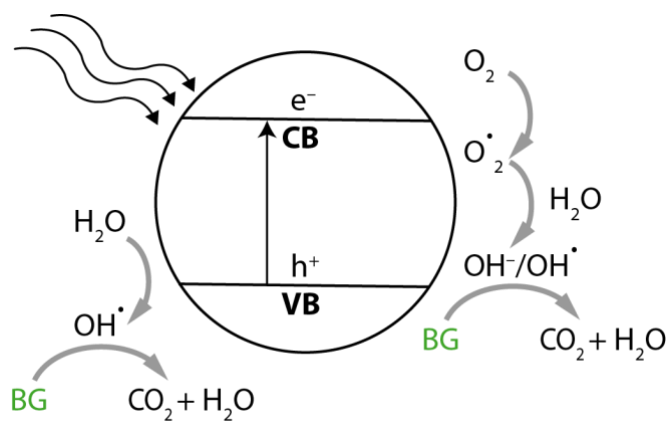

**Scheme. S1.** Plausible photocatalytic mechanism of BG dye degradation by **1**.

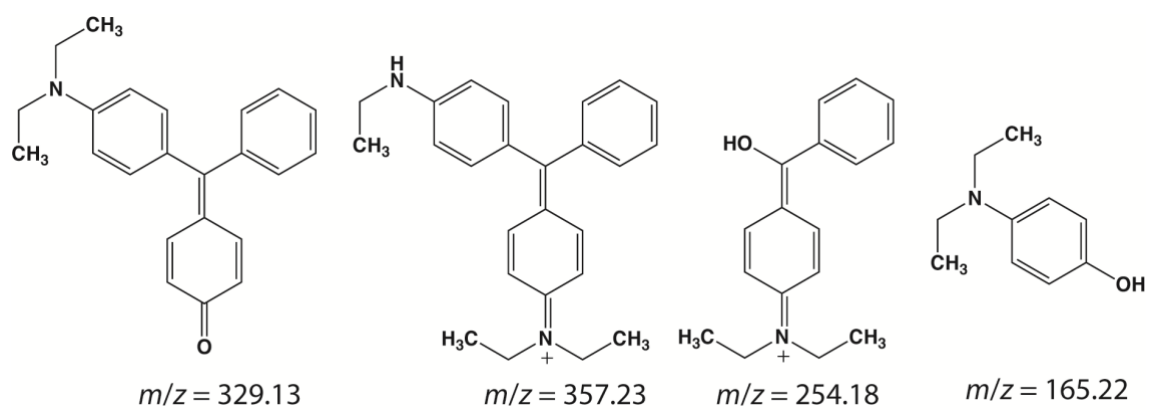

**Scheme. S2.** Identified species by liquid chromatography/tandem mass spectrometry after 30 min of photocatalytic experiment.

## References

1. Mon, M.; Bruno, R.; Ferrando-Soria, J.; Bartella, L.; Di Donna, L.; Talia, M.; Lappano, R.; Maggiolini, M.; Armenatno, D.; Pardo, E. Crystallographic snapshots of host-guest interactions in drugs@metal-organic frameworks: towards mimicking molecular recognition processes. *Mater. Horiz.* **5**, 683 (2018).
2. SAINT, version 6.45, Bruker Analytical X-ray Systems, Madison, WI, 2003.
3. Sheldrick G.M. SADABS Program for Absorption Correction, version 2.10, Analytical X-ray Systems, Madison, WI, 2003.
4. (a) Sheldrick, G. M. Crystal structure refinement with SHELXL. *Acta Cryst. C* **71**, 3 (2015). (b) Sheldrick, G. M. A short history of SHELX. *Acta Cryst. A* **64**, 112 (2008). (c) SHELXTL-2013/4, Bruker Analytical X-ray Instruments, Madison, WI, 2013.
5. (a) Spek, A. L. PLATON SQUEEZE: a tool for the calculation of the disordered solvent contribution to the calculated structure factors. *Acta Crystallogr. Sect. C-Struct. Chem.* **71**, 9 (2015). (b) Spek, A. L. Structure validation in chemical crystallography. *Acta Crystallogr. Sect. D, Biol. Crystallogr.* **65**, 148 (2009).
6. Farrugia, L. J. WinGX suite for small-molecule single-crystal crystallography. *J. Appl. Crystallogr.* **32**, 837 (1999).
7. Palmer, D. CRYSTAL MAKER, Cambridge University Technical Services, C. No Title, 1996.
8. Kresse, G.; Furthmüller, Efficient iterative schemes for *ab initio* total-energy calculations using a plane-wave basis set, *J. Phys. Rev. B* **54**, 11169 (1996).
9. a) Perdew, J. P.; Burke, K.; Ernzerhof, M. Generalized Gradient Approximation Made Simple. *Phys. Rev. Lett.* **77**, 3865 (1996). b) Perdew, J. P.; Burke, K.; Ernzerhof, M. Generalized Gradient Approximation Made Simple. *Phys. Rev. Lett.* **78**, 1396 (1997).
10. Blöchl, P. E. Projector augmented-wave method. *Phys. Rev. B* **50**, 17953 (1994).
11. a) Henkelman, G.; Arnaldsson, A.; Jonsson, H. A fast and robust algorithm for Bader decomposition of charge density. *Comput. Mater. Sci.* **36**, 354 (2006). b) Sanville, E.; Kenny, S. D.; Smith, R.; Henkelman, G. Improved Grid-Based Algorithm for Bader Charge Allocation. *J. Comput. Chem.* **28**, 899 (2007).
12. Simonelli, L. et al. CLÆSS: The hard X-ray absorption beamline of the ALBA CELLS synchrotron. *Cog. Phys.* **3**, 1231987 (2016).
13. Ravel, B.; Newville, M. ATHENA, ARTEMIS, HEPHAESTUS: data analysis for X-ray absorption spectroscopy using IFEFFIT, *J. Synchr. Rad.* **12**, 537 (2005).
14. a) Pd-S: Grønvold, F.; Røst, E. The crystal structure of PdSe<sub>2</sub> and PdS<sub>2</sub>. *Acta Cryst.* **10**, 329 (1957). b) Pd-Pd: Whyckoff R. W. G. Crystal Structures **1**, 7 (1963) Second edition. Interscience Publishers, New York, New York.
